# Supplementary figures and images for: Advances in Understanding the Mechanism of Action of the Auxin Permease AUX1
Source: MDPI journal article supplement (doi:10.3390/ijms19113391), 2018-10-30

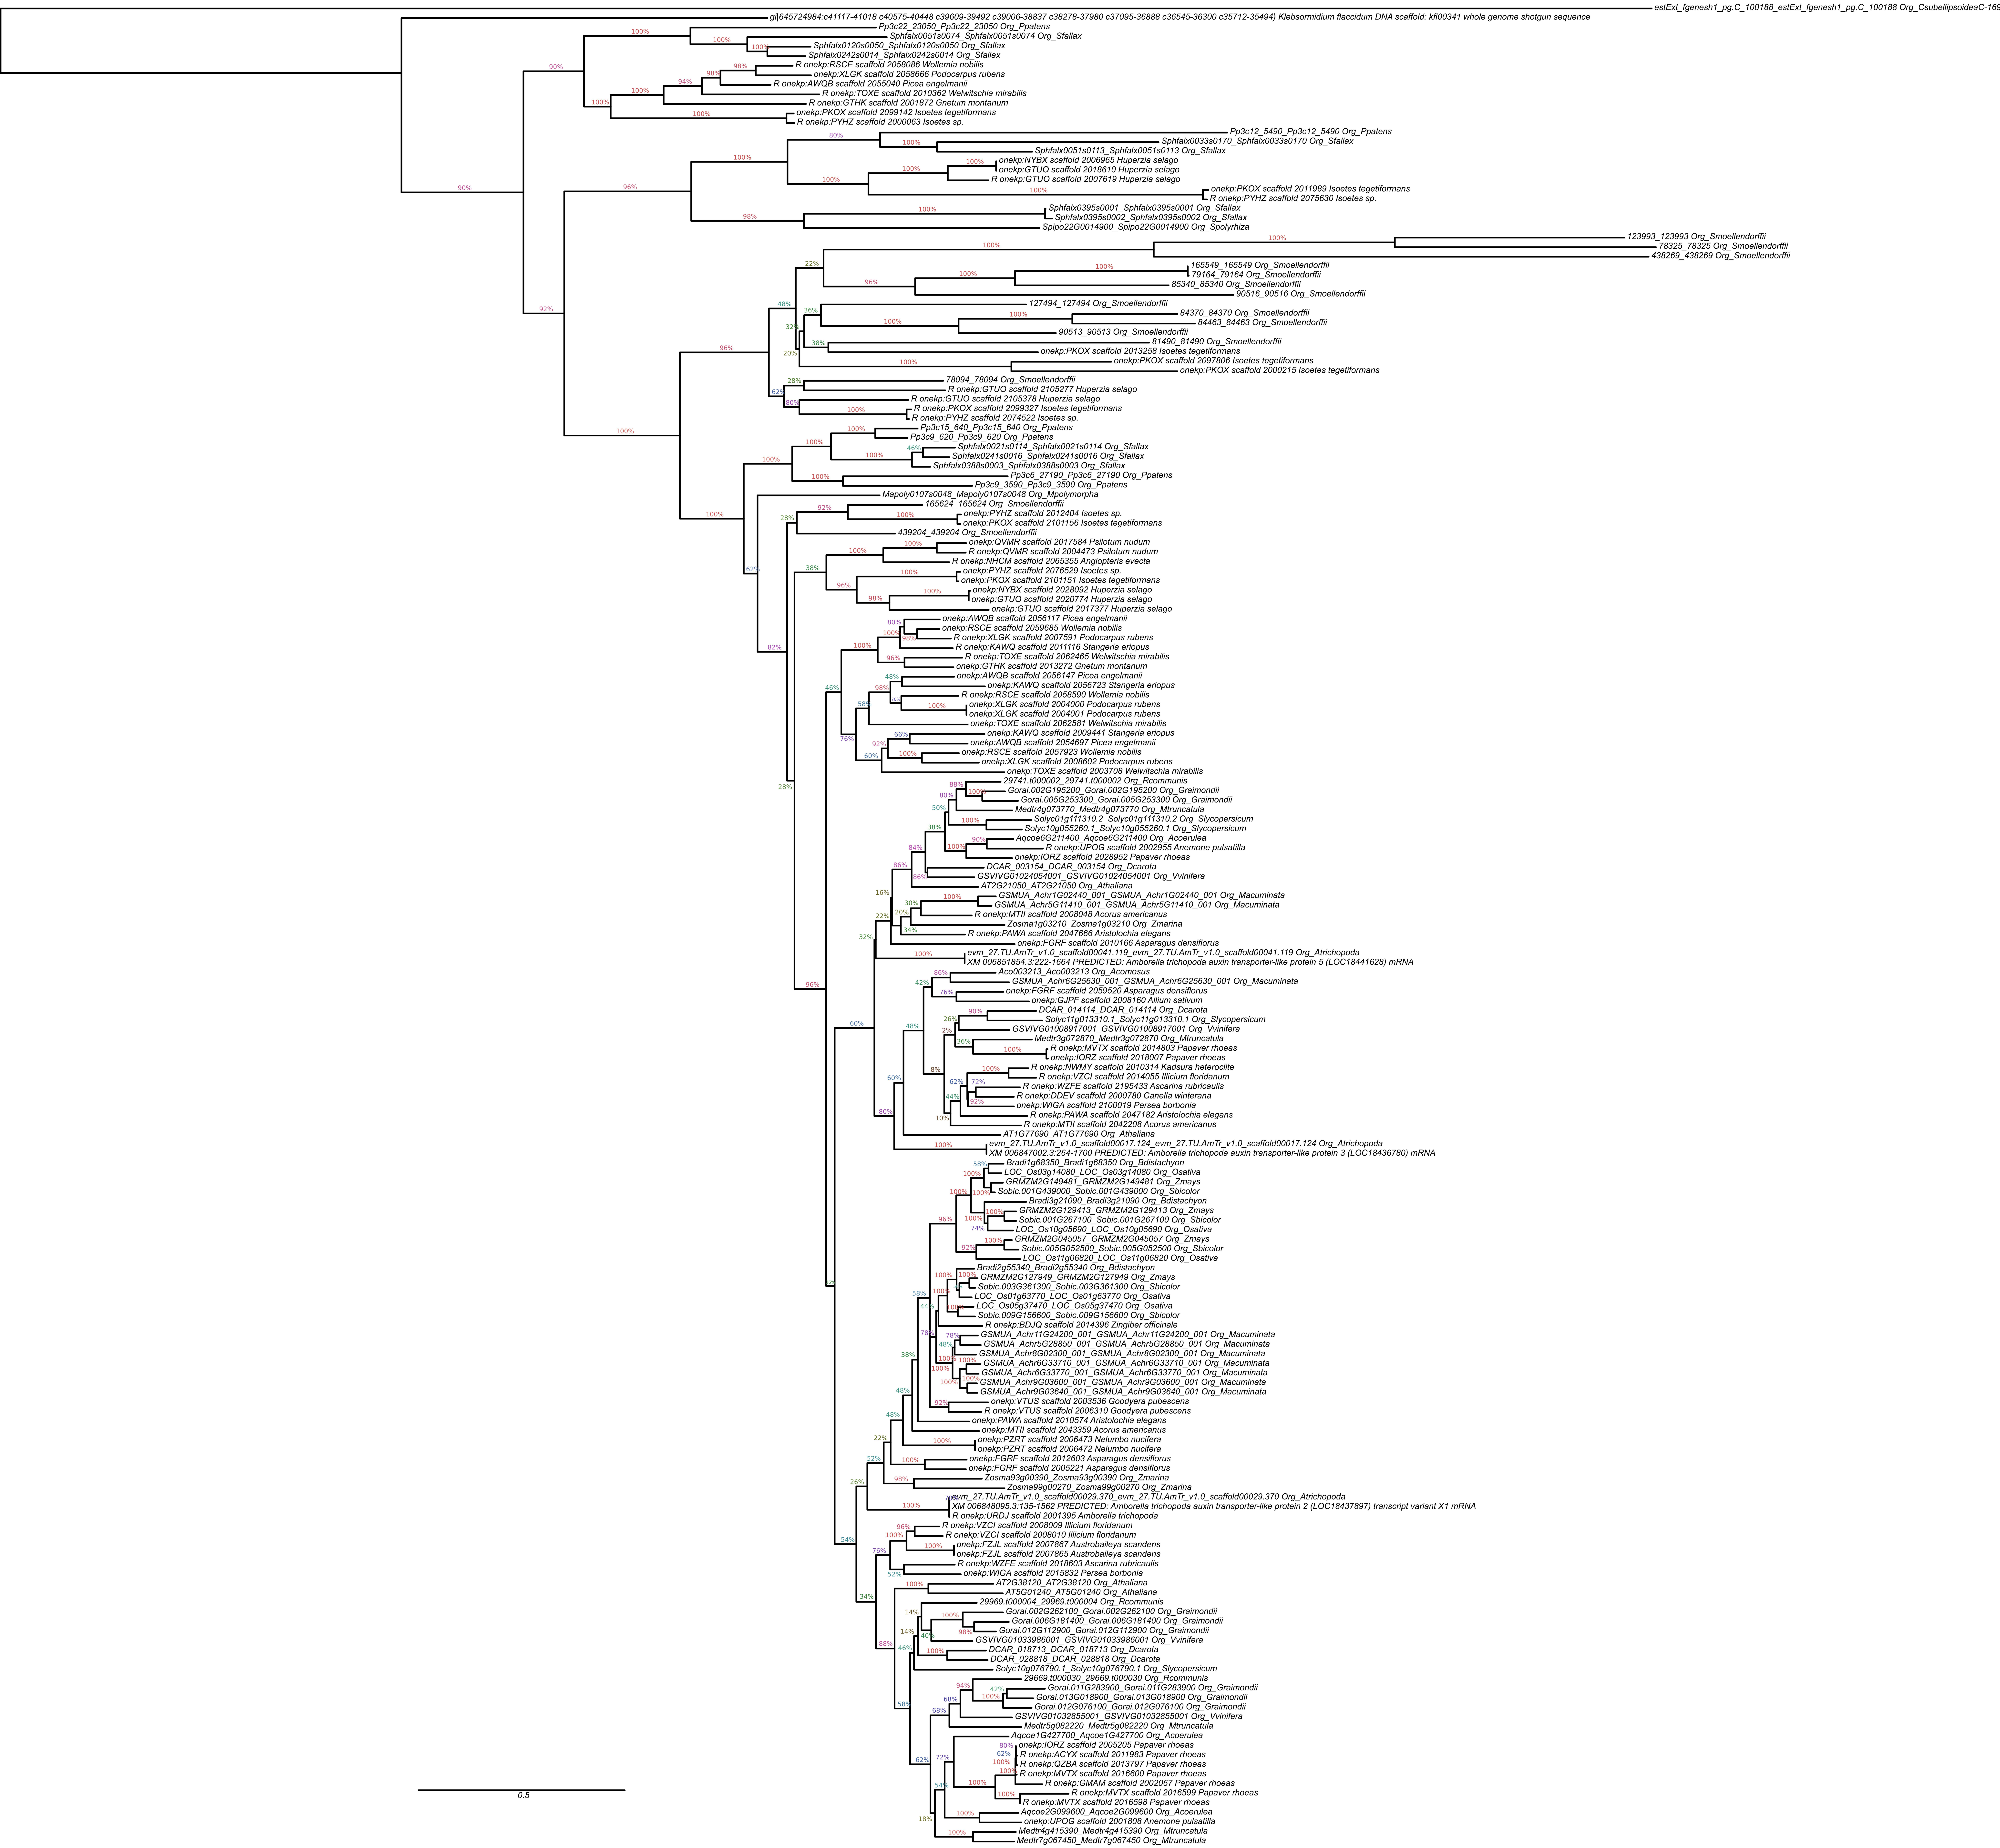

Supplement: s1 [file s1]
